# Supplementary material for: Control of hydrogen bond network dimensionality in tetrachloroplatinate salts
Source: Royal Society of Chemistry journal article supplement (doi:10.1039/b009515j), 2001-01-01
Supplement: b009515j1.pdf [file b009515j1.pdf]

## FOR DEPOSITION

*Synthesis of* [4,4'-H<sub>2</sub>bipip][PtCl<sub>4</sub>] (2). Addition of a colourless solution of [[4,4'-bipiperidine.2HCl (120mg, 0.5 mmol) in H<sub>2</sub>O (15 ml) and HCl (0.5 ml, 37%) to a brown solution of K<sub>2</sub>PtCl<sub>4</sub> (207.5mg, 0.5 mmol) in H<sub>2</sub>O (10 ml) caused the formation of a precipitate that dissolved in hot water. Orange crystals of [4,4'-H<sub>2</sub>bipip][PtCl<sub>4</sub>] (2) were grown from a slowly cooled solution. Yield 144 mg (44 %). Micro-analytical data (%). Found: C, 23.62; H, 4.81 ; N, 5.36. Calc.: C, 23.67; H, 4.34; N, 5.52.

Synthesis of [piperazinium][PtCl<sub>4</sub>] (3). Addition of a colourless solution of piperazine (86mg, 1 mmol) in H<sub>2</sub>O (15 ml) and HCl (0.5 ml, 37%) to a brown solution of K<sub>2</sub>PtCl<sub>4</sub> (163 mg, 0.4mmol) in H<sub>2</sub>O (10 ml) caused the formation of an orange solution. The solution was heated to reduce its volume and left to cool slowly. After a partial evaporation of the solvent, orange crystals of [piperazinium][PtCl<sub>4</sub>] (3) were obtained. Yield 29mg, (14.7 %). Micro-analytical data (%). Found: C, 11.41; H, 2.87 ; N, 6.05. Calc.: C, 11.30; H, 2.80; N, 6.60.

Synthesis of [HNC<sub>5</sub>H<sub>4</sub>CO<sub>2</sub>H-4]<sub>2</sub>[PtCl<sub>4</sub>].2H<sub>2</sub>O (4). Addition of a colourless solution of isonicotinic acid (62 mg, 0.5 mmol) in H<sub>2</sub>O (10 ml) and HCl (0.2 ml, 37%) to a brown solution of K<sub>2</sub>PtCl<sub>4</sub> (102mg, 0.25 mmol) in H<sub>2</sub>O (10 ml) caused the formation of an orange solution. The solution was heated to reduce its volume and left to cool slowly. After partial evaporation of the solvent, orange crystals of [HNC<sub>5</sub>H<sub>4</sub>CO<sub>2</sub>H-4]<sub>2</sub>[PtCl<sub>4</sub>].2H<sub>2</sub>O (4) were obtained. Yield 66mg, (40 %). Micro-analytical data (%). Found: C, 23.29; H, 2.67 ; N, 4.09. Calc.: C, 23.19; H, 2.58; N, 4.51.

Synthesis of [HNC<sub>5</sub>H<sub>4</sub>CONH<sub>2</sub>-4]<sub>2</sub>[PtCl<sub>4</sub>] (5). Addition of a colourless solution of isonicotinamide (124mg, 1 mmol) in H<sub>2</sub>O (15 ml) and HCl (0.5 ml, 37%) to a brown solution of K<sub>2</sub>PtCl<sub>4</sub> (163mg, 0.4mmol) in H<sub>2</sub>O (10 ml) caused the formation of an orange solution. The solution was heated to reduce its volume and left to cool slowly. After partial evaporation of the solvent, orange crystals of [HNC<sub>5</sub>H<sub>4</sub>CONH<sub>2</sub>-4]<sub>2</sub>[PtCl<sub>4</sub>] (5) are obtained as well as other
