# Supplementary material for: Control of hydrogen bond network dimensionality in tetrachloroplatinate salts
Source: Royal Society of Chemistry journal article supplement (doi:10.1039/b009515j), 2001-01-01
Supplement: b009515j2.pdf [file b009515j2.pdf]

unidentified solids, presumably including products of hydrolysis of the isonicotinamide (as implied by the results of microanalysis of the bulk product). Micro-analytical data(%). Found: C, 24.42; H, 2.25 ; N, 7.16. Calc.: C, 24.70; H, 2.40; N, 9.61.
